# Supplementary figures and images for: Modulation of sleep-courtship balance by nutritional status in Drosophila
Source: eLife journal article supplement (doi:10.7554/elife.60853), 2020-10-21

Figure 1-figure supplement 3

Multi-beam DAM  
Inter- & intra-beam

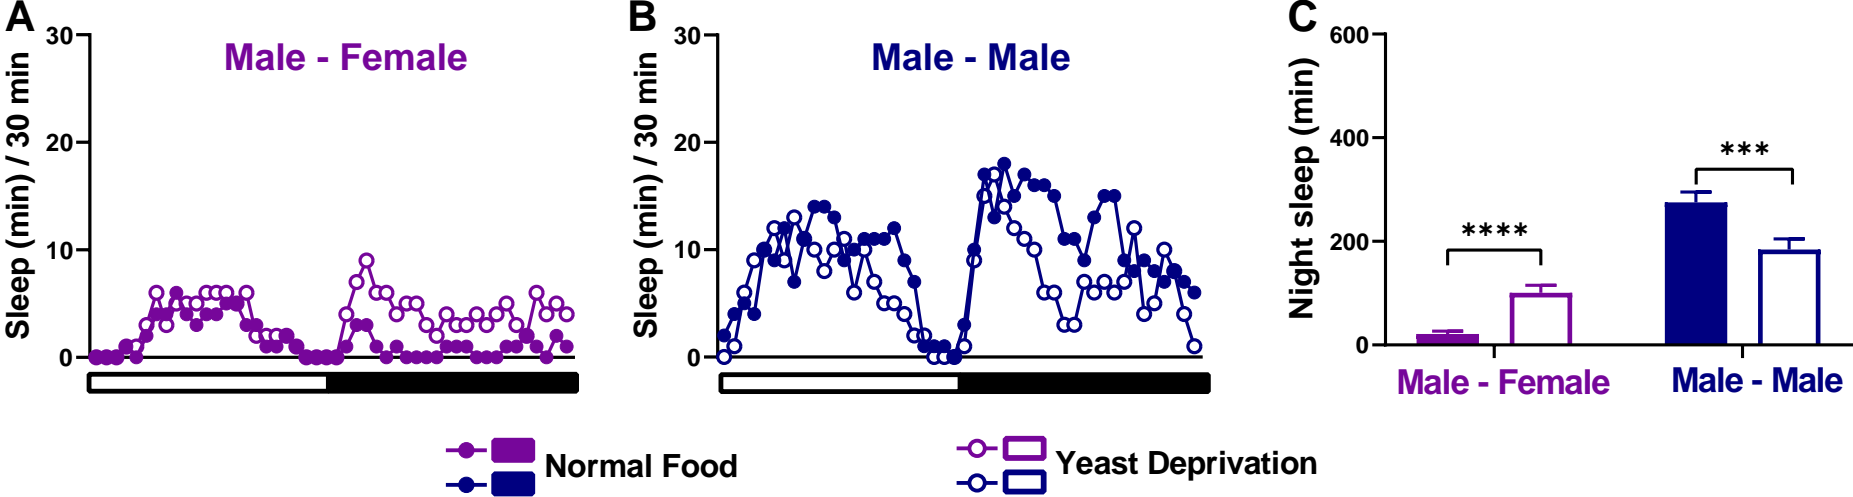

Supplement: supp [file elife-60853-supp-v1.zip]

# Figure 1-figure supplement 2

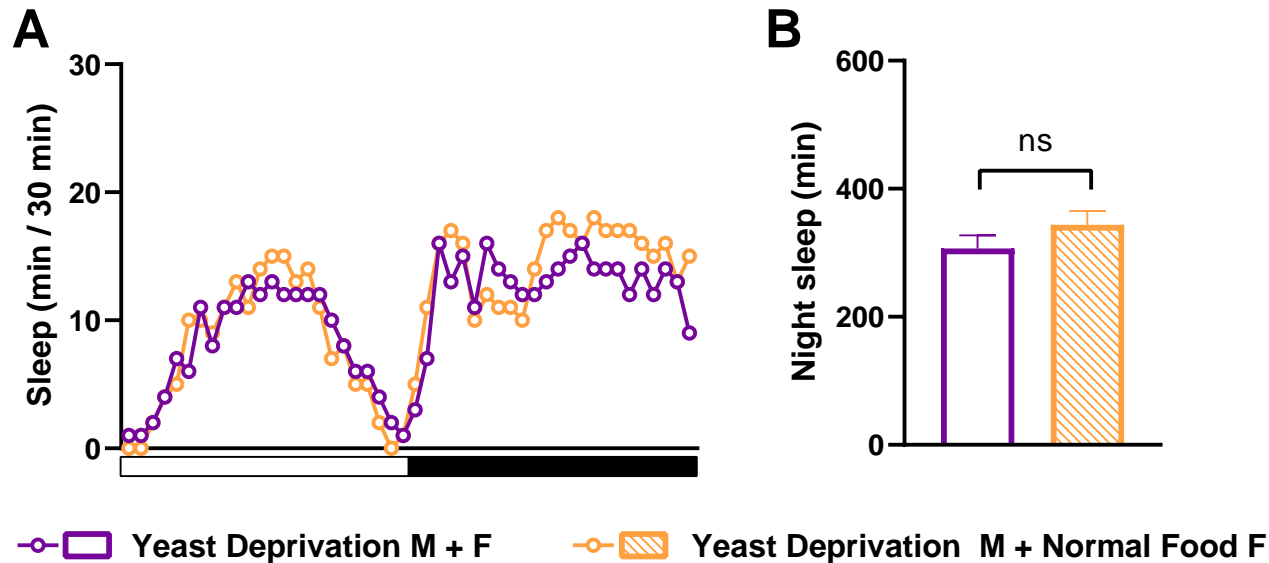

Supplement: supp [file elife-60853-supp-v1.zip]

Figure 5-figure supplement 1

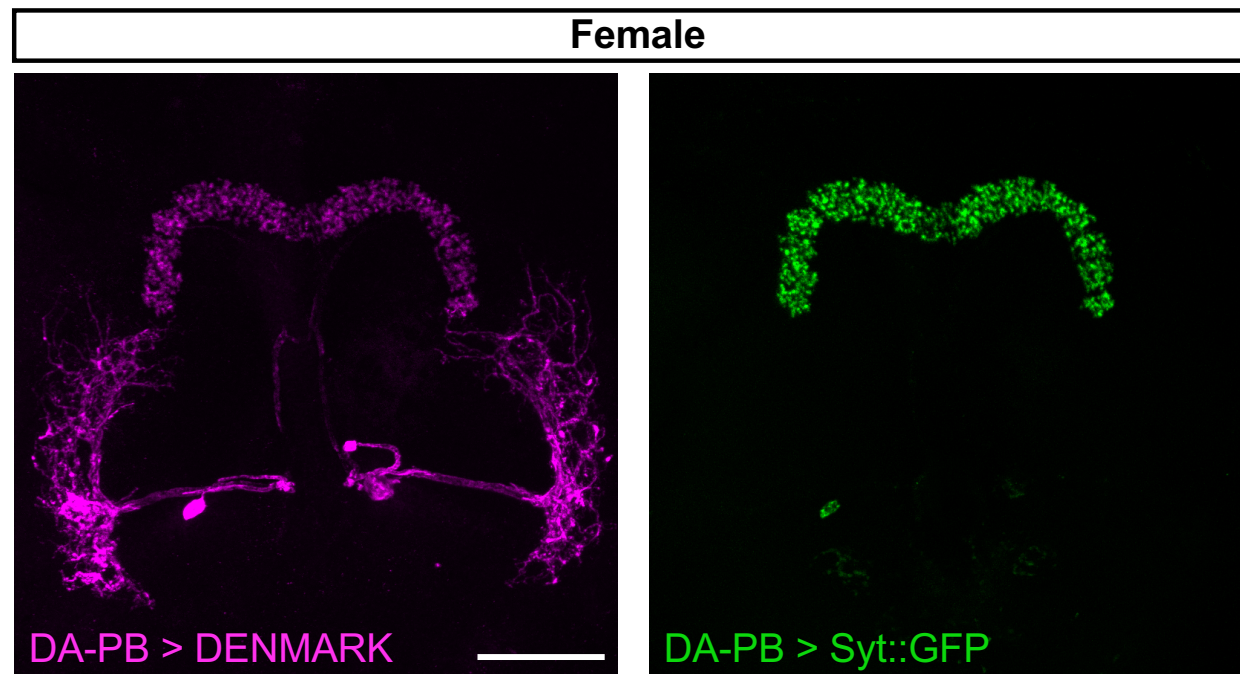

Supplement: supp [file elife-60853-supp-v1.zip]

# Figure 1-figure supplement 1

## Individual Male

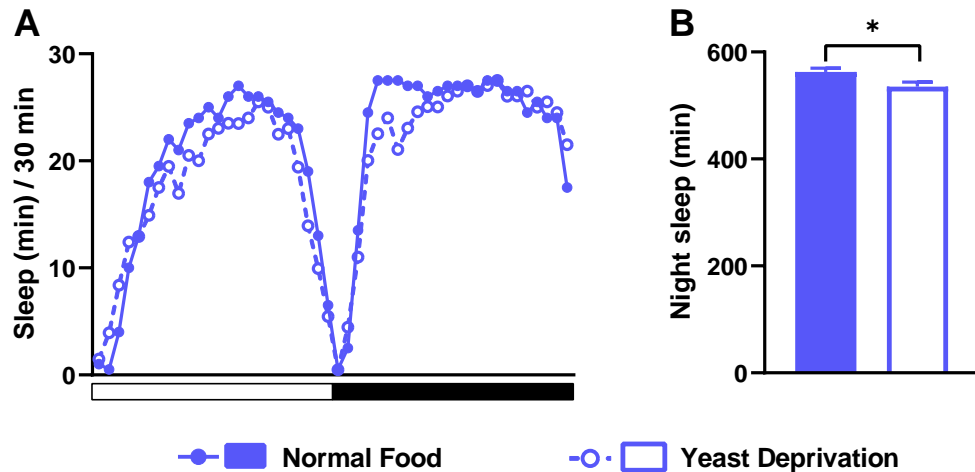

## Individual Female

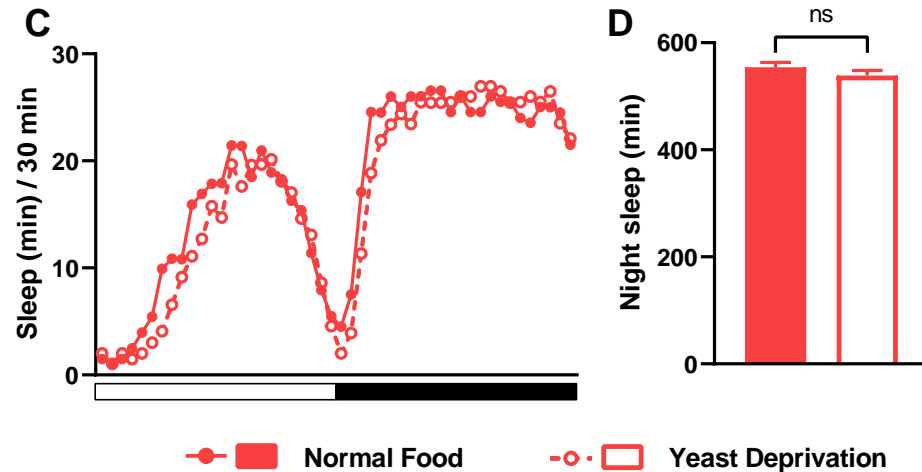

Supplement: supp [file elife-60853-supp-v1.zip]

Figure 7-figure supplement 1

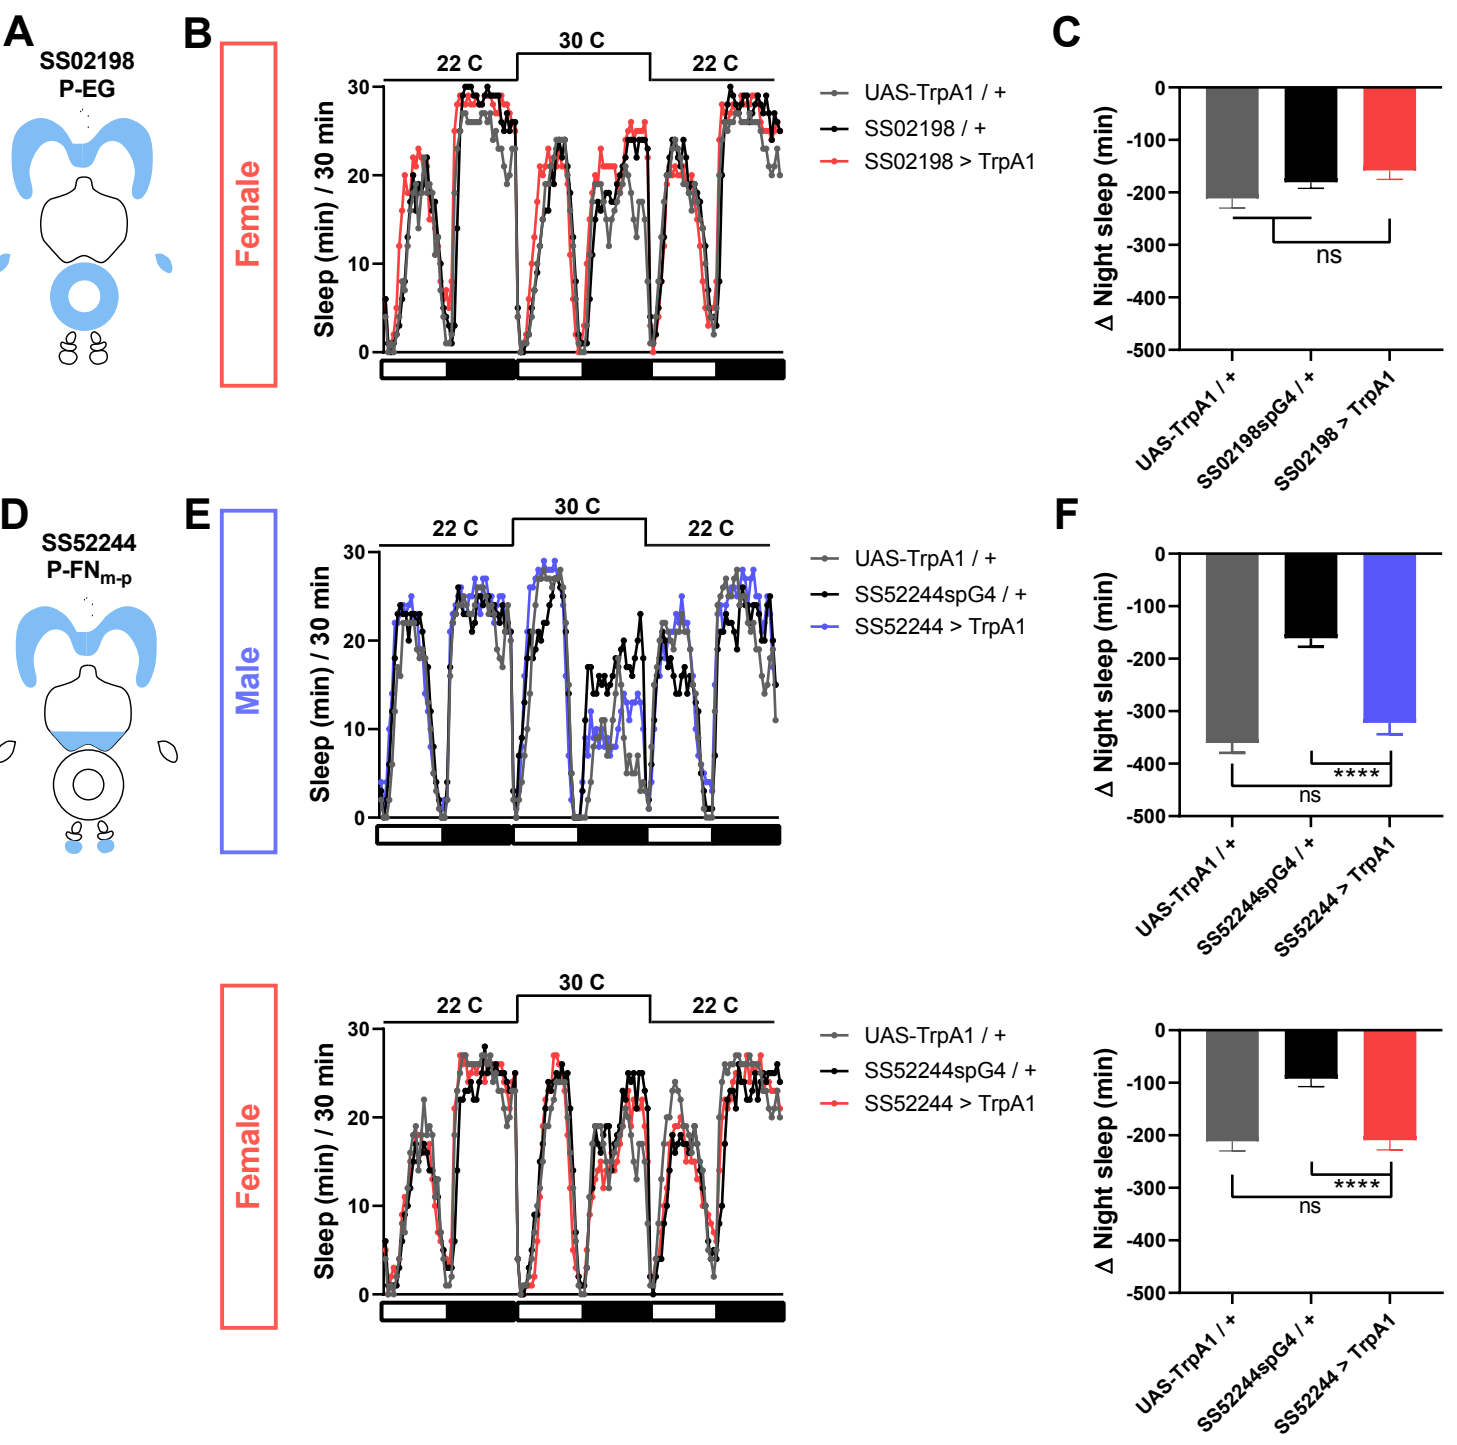

Supplement: supp [file elife-60853-supp-v1.zip]
